# Supplementary material for: Corporate political activity of baby food companies in Thailand
Source: Springer Nature journal article supplement (doi:10.1186/s13006-021-00437-6), 2021-12-01
Supplement: MOESM1 [file 19974712]

**Additional file 1: Framework of CPA of food industry with respect to public health [1]**

| <b>Strategies</b>                  | <b>Practices</b>                                                     | <b>Mechanisms</b>                                                                                                                                                                                                                                                                                                                                                                                |
|------------------------------------|----------------------------------------------------------------------|--------------------------------------------------------------------------------------------------------------------------------------------------------------------------------------------------------------------------------------------------------------------------------------------------------------------------------------------------------------------------------------------------|
| <b>1 information and messaging</b> | 1.1 Lobby policymakers                                               | 1. Lobby directly and indirectly (through third parties) to influence legislation and regulation so that it is favorable to the industry                                                                                                                                                                                                                                                         |
|                                    | 1.2 Stress the economic importance of the industry                   | 1. Stress the number of jobs supported and the money generated for the economy                                                                                                                                                                                                                                                                                                                   |
|                                    | 1.3 Promote deregulation                                             | 1. Highlight the potential burden associated with regulation (losses of jobs, administrative burden)<br>2. Demonize the 'nanny state'<br>3. Threaten to withdraw investments if new public health policies are introduced                                                                                                                                                                        |
|                                    | 1.4 Frame the debate on diet- and public health-related issues       | 1. Shift the blame away from the food industry, e.g. focus on individual responsibility, role of parents, physical inactivity<br>2. Promote the good intentions and stress the good traits of the food industry<br>3. Emphasize the food industry's actions to address public health-related issues                                                                                              |
|                                    | 1.5 Shape the evidence base on diet and public health-related issues | 1. Fund research, including through academics, ghost writers, own research institutions and front groups<br>2. Pay scientists as advisers, consultants or spokespersons<br>3. Cherry pick data that favors the industry<br>4. Disseminate and use non-peer reviewed or unpublished evidence<br>5. Participate in and host scientific events<br>6. Provide industry-sponsored education materials |

| Strategies                     | Practices                                                                       | Mechanisms                                                                                                                                                                                                                                                                                                                                        |
|--------------------------------|---------------------------------------------------------------------------------|---------------------------------------------------------------------------------------------------------------------------------------------------------------------------------------------------------------------------------------------------------------------------------------------------------------------------------------------------|
|                                |                                                                                 | <ul style="list-style-type: none"> <li>7. Suppress or influence the dissemination of research</li> <li>8. Emphasize disagreement among scientists and focus on doubt in science</li> <li>9. Criticize evidence and emphasize its complexity and uncertainty</li> </ul>                                                                            |
| <b>2 financial incentive</b>   | 2.1 Fund and provide financial incentives to political parties and policymakers | 1. Provide donations, gifts, entertainment or other financial inducements                                                                                                                                                                                                                                                                         |
| <b>3 constituency building</b> | 3.1 Establish relationships with key opinion leaders and health organizations   | <ul style="list-style-type: none"> <li>1. Promote public-private interactions, including philanthropic, transactional and transformational relationships</li> <li>2. Support professional organizations through funding and/or advertising in their publications</li> <li>3. Establish informal relationships with key opinion leaders</li> </ul> |
|                                | 3.2 Seek involvement in the community                                           | <ul style="list-style-type: none"> <li>1. Undertake corporate philanthropy</li> <li>2. Support physical activity initiatives</li> <li>3. Support events (such as for youth or the arts) and community-level initiatives</li> </ul>                                                                                                                |
|                                | 3.3 Establish relationships with policymakers                                   | <ul style="list-style-type: none"> <li>1. Seek involvement in working groups, technical groups and advisory groups</li> <li>2. Provide technical support and advice to policymakers</li> <li>3. Use the 'revolving door', i.e. ex-food industry staff work in government organizations and vice versa</li> </ul>                                  |
|                                | 3.4 Establish relationships with the media                                      | 1. Establish close relationships with media organizations, journalists and bloggers to facilitate media advocacy                                                                                                                                                                                                                                  |

| Strategies                                            | Practices                                                                              | Mechanisms                                                                                                                                                                                                 |
|-------------------------------------------------------|----------------------------------------------------------------------------------------|------------------------------------------------------------------------------------------------------------------------------------------------------------------------------------------------------------|
| <b>4 legal</b>                                        | 4.1 Use legal action (or the threat thereof) against public policies or opponents      | 1. Litigate or threaten to litigate against governments, organizations or individuals                                                                                                                      |
|                                                       | 4.2 Influence the development of trade and investment agreements                       | 1. Influence the development of trade and investment agreements such that clauses favorable to the industry are included (e.g. limited trade restrictions, mechanisms for corporations to sue governments) |
| <b>5 policy substitution</b>                          | 5.1 Develop and promote alternatives to policies                                       | 1. Develop and promote voluntary codes, self-regulation and non-regulatory initiatives                                                                                                                     |
| <b>6 opposition fragmentation and destabilization</b> | 6.1 Criticize public health advocates                                                  | 1. Criticize public health advocates personally and publicly, e.g. through the media, blogs                                                                                                                |
|                                                       | 6.2 Create multiple voices against public health measures                              | 1. Establish fake grassroots organizations ('astroturfing')<br>2. Procure the support of community and business groups to oppose public health measures                                                    |
|                                                       | 6.3 Infiltrate, monitor and distract public health advocates, groups and organizations | 1. Monitor the operations and advocacy strategies of public health advocates, groups and organizations<br>2. Support the placement of industry-friendly personnel within health organizations              |

1. Mialon M, Swinburn B, Sacks G. A proposed approach to systematically identify and monitor the corporate political activity of the food industry with respect to public health using publicly available information. *Obes Rev.* 2015;16(7):519-30.
