# Supplementary material for: Corporate political activity of baby food companies in Thailand
Source: Springer Nature journal article supplement (doi:10.1186/s13006-021-00437-6), 2021-12-01
Supplement: MOESM3 [file 19974712]

**Additional file 3:** Key different issues between bill and the Control of Marketing Promotion of Infant and Young Child Food Act B.E. 2560

| Issues                               | The Bill (August 2015)                                                                                                                                                                                                                | Thai Milk Act (April 2017)                                                                                                                                                                                                      |
|--------------------------------------|---------------------------------------------------------------------------------------------------------------------------------------------------------------------------------------------------------------------------------------|---------------------------------------------------------------------------------------------------------------------------------------------------------------------------------------------------------------------------------|
| Growing-up milk                      | The Bill covered growing-up milk                                                                                                                                                                                                      | Growing-up milk is included, but it has to be specifically proclaimed by the Minister with the advice of the Committee.                                                                                                         |
| Incentive for health professionals   | Do not give or offer any gifts, money, incentives, or other benefits to health professionals.                                                                                                                                         | Companies can offer any gifts, money, incentives, or other benefits to health professionals if it is traditional giving.                                                                                                        |
| Academic conference                  | Companies can provide funds to professional medical and public health organizations for academic conferences, training or seminar about baby food.                                                                                    | Companies can provide funds to professional medical and public health organizations; and public universities that offer curriculums on maternal and child health for academic conferences, training or seminar about baby food. |
| Information for health professionals | Companies can provide information to health professionals. The information must not provide incorrect or concealed or over-claimed or distorted information about baby food, also, the information dose not compare to breastfeeding. | In providing information about baby food to health professionals, the information should be supported by scientific evidence.                                                                                                   |
| Labelling                            | Details of how to label, for example, labels of baby food products must have message “breastfeeding is the best”                                                                                                                      | The Act focuses on cross promotion by label only. There are no details about messages presented on labels.                                                                                                                      |
